# Supplementary material for: Hypoxia-Related Gene FUT11 Promotes Pancreatic Cancer Progression by Maintaining the Stability of PDK1
Source: Front Oncol. 2021 Jun 17;11:675991. doi: 10.3389/fonc.2021.675991 (PMC8247946; doi:10.3389/fonc.2021.675991)
Supplement: Supplementary Table 1 — The primers used for quantitative real-time PCR (qRT-PCR) and plasmid sequence. [file Table_1.xlsx]

## Sheet: Sheet1
GENE	Sequence (5' -> 3')
FUT11	Forward Primer	GCGGGTGGGGAGGCTGAG
	Reverse Primer	ACACTGGTAGGTCCACGGTCTC
ADM	Forward Primer	ATGAAGCTGGTTTCCGTCG
	Reverse Primer	GACATCCGCAGTTCCCTCTT
C4ORF3	Forward Primer	CCGGGTGTTGATGGTCGAG
	Reverse Primer	GCCTCACATCGAAGTTCTGC
ERO1L	Forward Primer	GGCTGGGGATTCTTGTTTGG
	Reverse Primer	AGTAACCACTAACCTGGCAGA
BNIP3L	Forward Primer	TACAGGATCATTGGCTACACACC
	Reverse Primer	GGTCACATCGCTCCAGACT
NDRG1	Forward Primer	CTCCTGCAAGAGTTTGATGTCC
	Reverse Primer	TCATGCCGATGTCATGGTAGG
KCTD11	Forward Primer	CGGGGACCCCATCACTATGA
	Reverse Primer	TCAGAGTCGGTGCAGAAAAGG
SLC2A1	Forward Primer	GGCCAAGAGTGTGCTAAAGAA
	Reverse Primer	ACAGCGTTGATGCCAGACAG
P4HA1	Forward Primer	AGTACAGCGACAAAAGATCCAG
	Reverse Primer	CTCCAACTCACTCCACTCAGTA
HIF1A	Forward Primer	GAACGTCGAAAAGAAAAGTCTCG
	Reverse Primer	CCTTATCAAGATGCGAACTCACA
Control	UUCUCCGAACGUGUCACGU
	AGAUACAGUGGUCUCUAACUU
Si-FUT11	5'-GUUAGAGACCACUGUAUCUGC-3'
Si-HIF1A	5'-GCAAAGAUGAUAGUGACAATT-3'
